# Supplementary material for: Li/Ag2VO2PO4 batteries: the roles of composite electrode constituents on electrochemistry
Source: Royal Society of Chemistry journal article supplement (doi:10.1039/c6ra24024k), 2016-01-01
Supplement: c6ra24024k1.pdf [file c6ra24024k1.pdf]

## Electronic Supplementary Information (ESI): Li/Ag<sub>2</sub>VO<sub>2</sub>PO<sub>4</sub> Batteries: The Roles of Composite Electrode Constituents on Electrochemistry

David C. Bock<sup>a</sup>, Andrea M. Bruck<sup>b</sup>, Christopher J. Pelliccione<sup>a</sup>, Yiman Zhang<sup>b</sup>, Kenneth J. Takeuchi<sup>b, c</sup>, Amy C. Marschilok<sup>b, c</sup>, and Esther S. Takeuchi<sup>a, b, c</sup>

<sup>a</sup> Brookhaven National Laboratory, Upton, NY 11973, USA

<sup>b</sup> Department of Chemistry, Stony Brook University, Stony Brook, NY 11790, USA.

<sup>c</sup> Department of Materials Science and Engineering, Stony Brook University, Stony Brook, NY 11790, USA

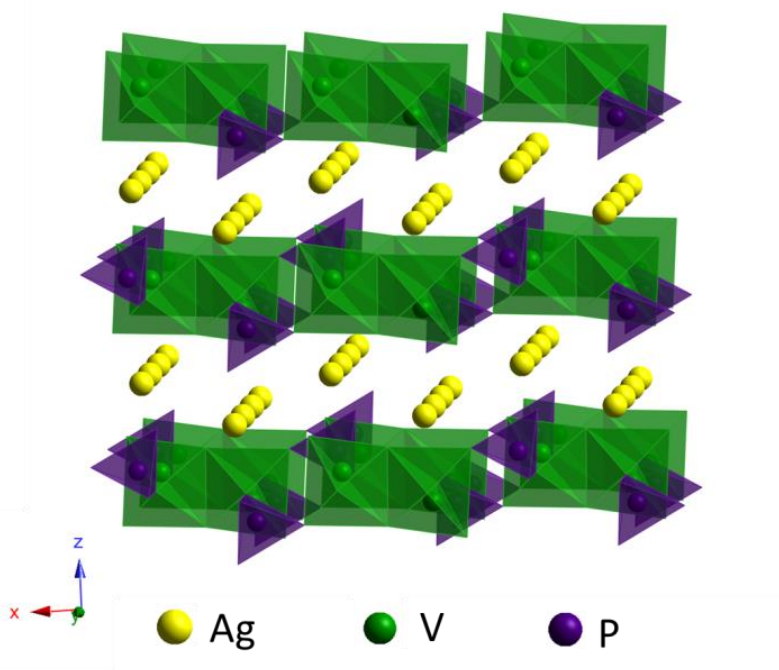

**Figure S1.** Crystal Structure of Ag<sub>2</sub>VO<sub>2</sub>PO<sub>4</sub>.

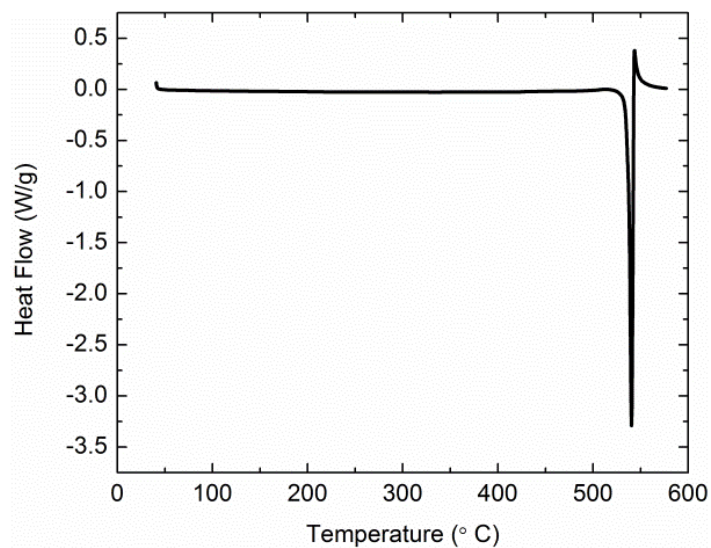

**Figure S2.** Differential Scanning Calorimetry of synthesized  $\text{Ag}_2\text{VO}_2\text{PO}_4$ .

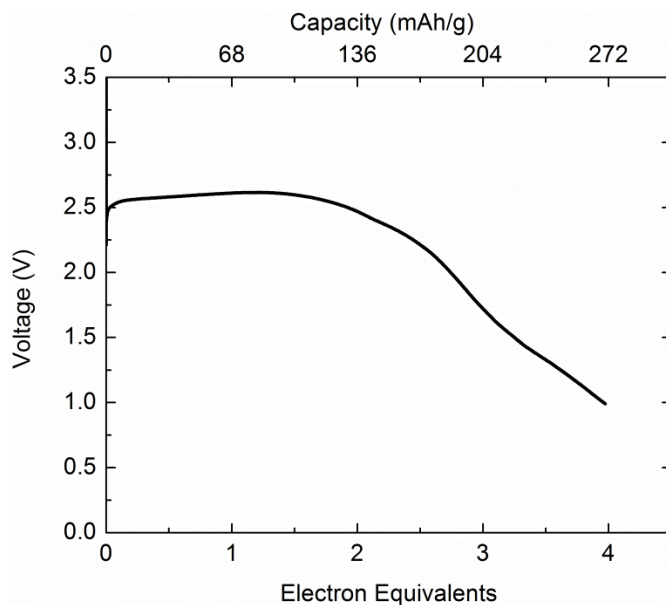

**Figure S3.** Constant current discharge of an  $\text{Ag}_2\text{VO}_2\text{PO}_4$  electrode at C/500 rate.

| Cathode Type                                               | # e  | Chi-Sqr  | R <sub>1</sub> |         | R <sub>2</sub> |         | R <sub>3</sub> |         | W <sub>01</sub> -R |         | W <sub>01</sub> -T |         | W <sub>01</sub> -P |         |
|------------------------------------------------------------|------|----------|----------------|---------|----------------|---------|----------------|---------|--------------------|---------|--------------------|---------|--------------------|---------|
|                                                            |      |          | R <sub>1</sub> | (Error) | R <sub>2</sub> | (Error) | R <sub>3</sub> | (Error) | W <sub>01</sub> -R | (Error) | W <sub>01</sub> -T | (Error) | W <sub>01</sub> -P | (Error) |
| Ag <sub>2</sub> VO <sub>2</sub> PO <sub>4</sub>            | 0    | 0.00143  | 5.69           | 0.049   | 24.06          | 1.13    | 5.35E+05       | 4790    | 200                | N/A     | 100                | N/A     | 0.35               | N/A     |
| Ag <sub>2</sub> VO <sub>2</sub> PO <sub>4</sub>            | 0.08 | 0.0008   | 4.337          | 0.026   | 47.95          | 1.05    | 155.3          | 1.88    | 155.3              | 1.88    | 126.1              | 7.2     | 0.4                | 0.003   |
| Ag <sub>2</sub> VO <sub>2</sub> PO <sub>4</sub>            | 0.2  | 0.000144 | 3.606          | 0.012   | 15.78          | 0.21    | 22.52          | 0.5099  | 121.1              | 1.9     | 40.9               | 1.2     | 0.33               | 0.0014  |
| Ag <sub>2</sub> VO <sub>2</sub> PO <sub>4</sub>            | 0.5  | 0.00133  | 2.096          | 0.016   | 11.93          | 0.555   | 8.203          | 1.14    | 47.34              | 2.462   | 37.65              | 3.5     | 0.352              | 0.004   |
| Ag <sub>2</sub> VO <sub>2</sub> PO <sub>4</sub> + PTFE     | 0    | 0.0026   | 4.96           | 0.053   | 24.85          | 1.99    | 5.43E+05       | 7403    | 200                | N/A     | 100                | N/A     | 0.35               | N/A     |
| Ag <sub>2</sub> VO <sub>2</sub> PO <sub>4</sub> + PTFE     | 0.08 | 0.0001   | 6.78           | 0.015   | 36.48          | 1.48    | 189.1          | 1.991   | 435.7              | 5.9117  | 90.77              | 1.855   | 0.4066             | 0.002   |
| Ag <sub>2</sub> VO <sub>2</sub> PO <sub>4</sub> + PTFE     | 0.2  | 0.000573 | 5.125          | 0.026   | 25.58          | 4.37    | 42.29          | 4.126   | 100.5              | 2.726   | 40.51              | 1.582   | 0.411              | 0.002   |
| Ag <sub>2</sub> VO <sub>2</sub> PO <sub>4</sub> + PTFE     | 0.5  | 0.00045  | 4.569          | 0.028   | 19.83          | 2.4805  | 28.06          | 2.2791  | 89.52              | 2.3138  | 94.75              | 3.777   | 0.3948             | 0.00367 |
| Ag <sub>2</sub> VO <sub>2</sub> PO <sub>4</sub> + PTFE + C | 0    | 0.0067   | 1.908          | 0.0566  | 42             | 0.34    | 8017           | 511     | 200                | N/A     | 100                | N/A     | 0.35               | N/A     |
| Ag <sub>2</sub> VO <sub>2</sub> PO <sub>4</sub> + PTFE + C | 0.08 | 0.000081 | 2.281          | 0.0147  | 28             | 0.205   | 4.342          | 0.35    | 31.59              | 0.798   | 0.656              | 0.017   | 0.4719             | 0.0019  |
| Ag <sub>2</sub> VO <sub>2</sub> PO <sub>4</sub> + PTFE + C | 0.2  | 0.0058   | 1.876          | 0.023   | 21.84          | 0.2     | 15             | 19      | 1436               | 200     | 67                 | 11      | 0.51               | 0.03    |
| Ag <sub>2</sub> VO <sub>2</sub> PO <sub>4</sub> + PTFE + C | 0.5  | 0.0018   | 1.537          | 0.0137  | 18.05          | 0.49    | 5.687          | 2.59    | 57.69              | 3.27    | 24.45              | 2.93    | 0.38               | 0.004   |

**Table S4.** Tabulated Equivalent Circuit Fit Results for EIS data.

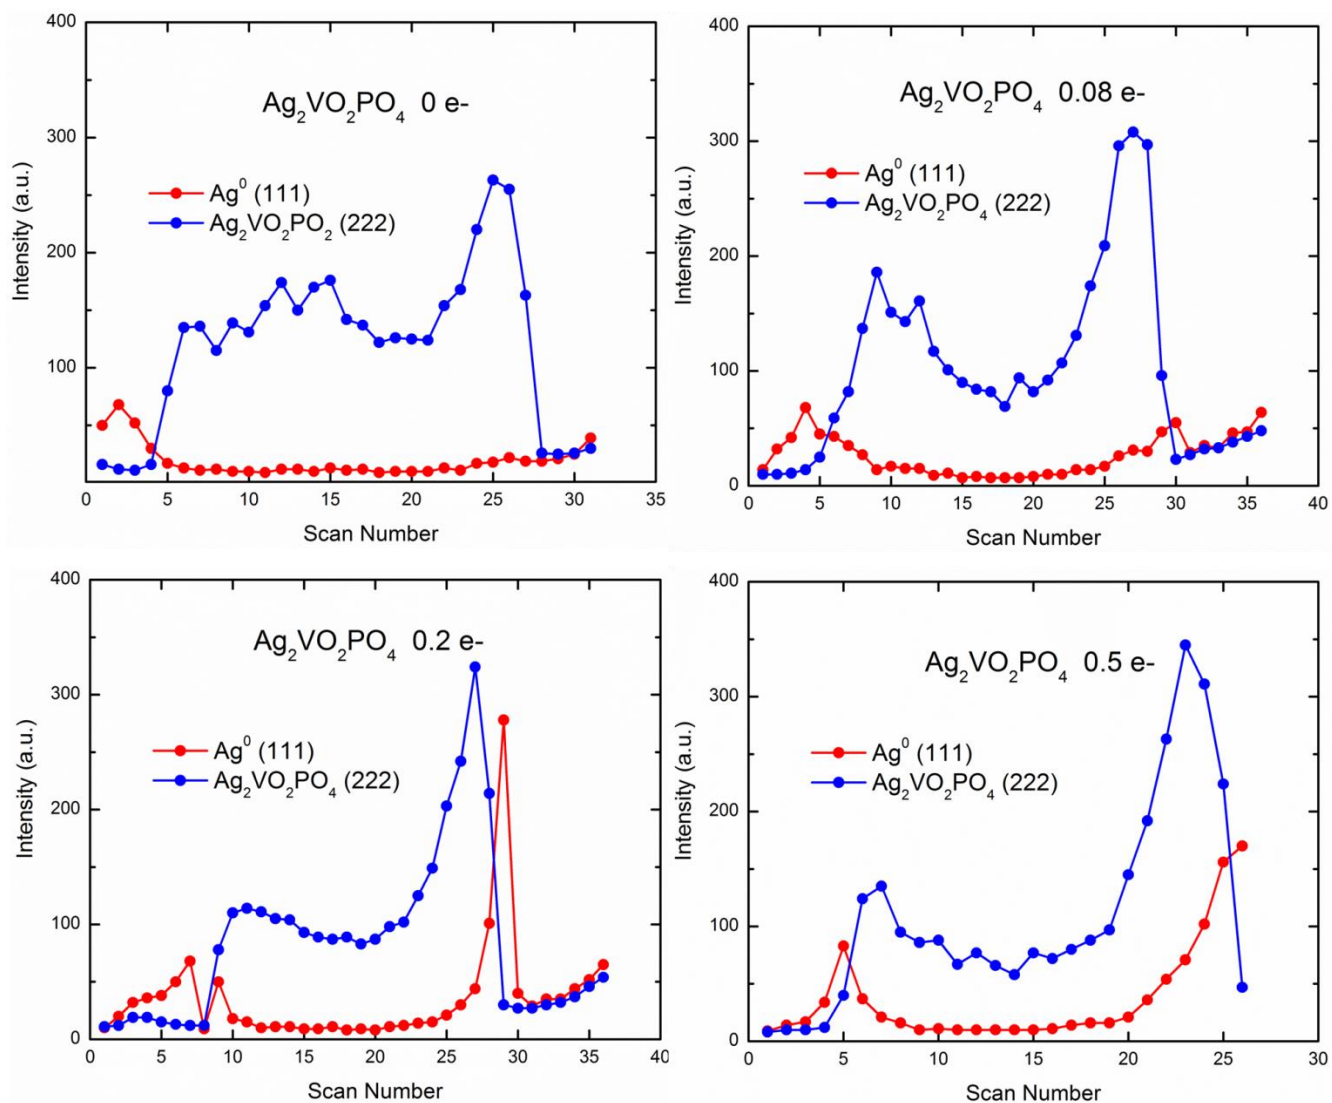

**Figure S5.**  $\text{Ag}^0$  (111) and  $\text{Ag}_2\text{VO}_2\text{PO}_4$  (222) peak intensities vs. scan number from EDXRD scans of the cathode region in Li /  $\text{Ag}_2\text{VO}_2\text{PO}_4$  cells. Scan number increases moving from the lithium interface to the current collector interface.

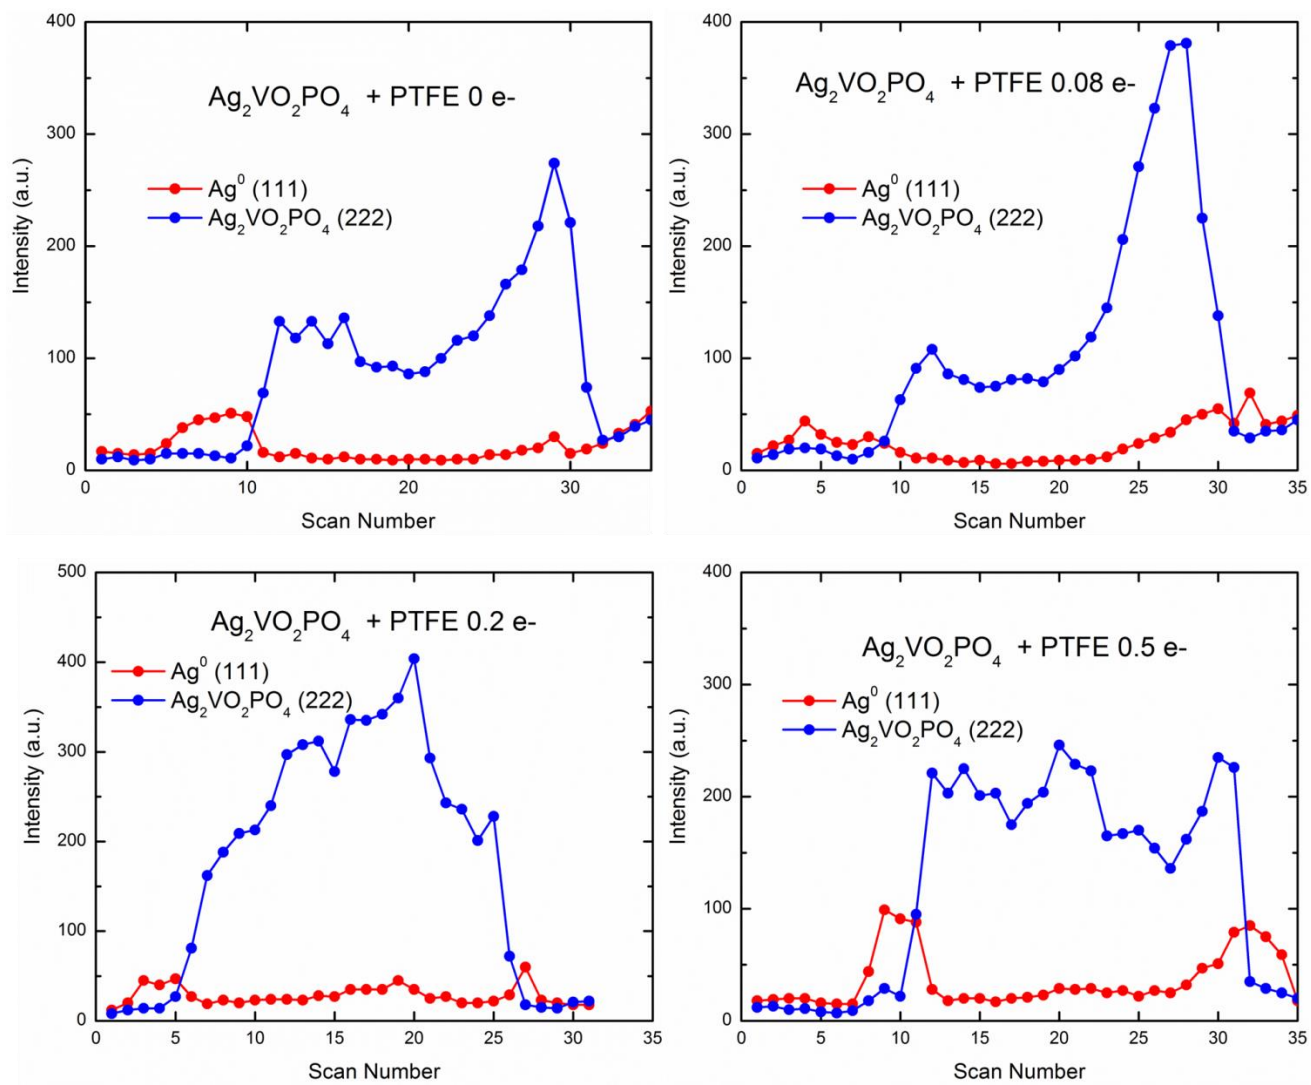

**Figure S6.**  $\text{Ag}^0$  (111) and  $\text{Ag}_2\text{VO}_2\text{PO}_4$  (222) peak intensities vs. scan number from EDXRD scans of the cathode region in  $\text{Li} / \text{Ag}_2\text{VO}_2\text{PO}_4 + \text{PTFE}$  cells. Scan number increases moving from the lithium interface to the current collector interface.

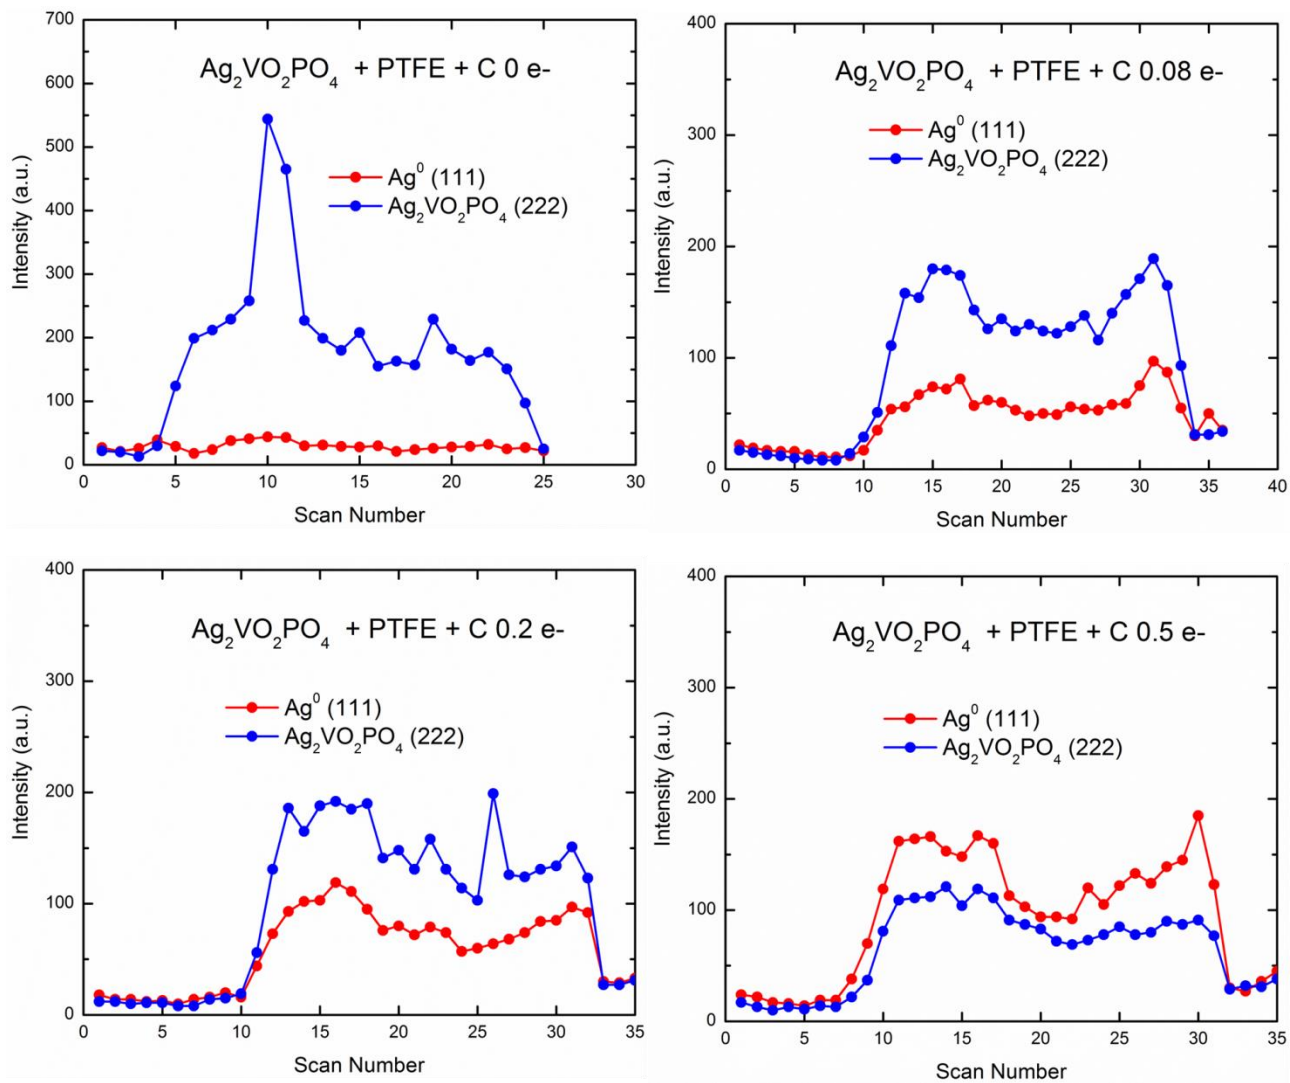

**Figure S7.**  $\text{Ag}^0$  (111) and  $\text{Ag}_2\text{VO}_2\text{PO}_4$  (222) peak intensities vs. scan number from EDXRD scans of the cathode region in Li /  $\text{Ag}_2\text{VO}_2\text{PO}_4 + \text{PTFE} + \text{C}$  cells. Scan number increases moving from the lithium interface to the current collector interface.

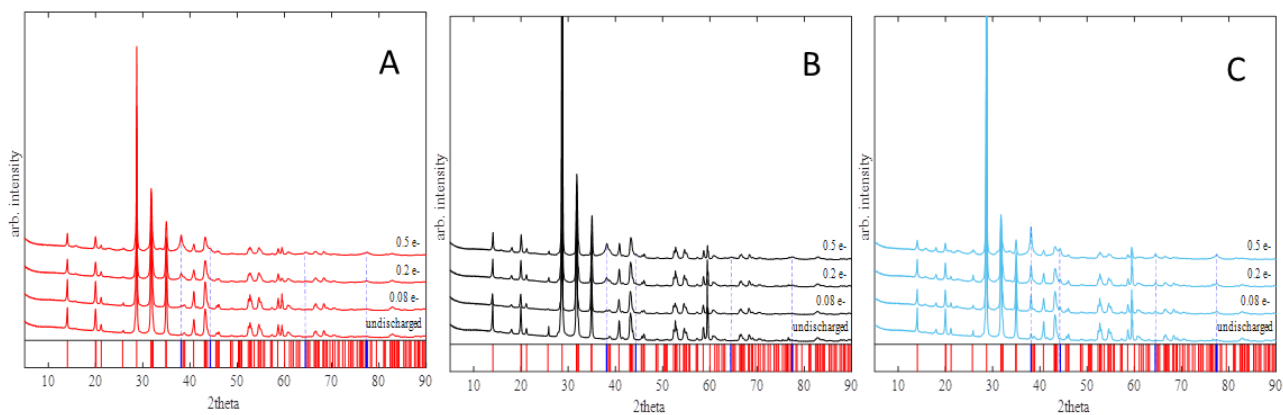

**Figure S8.** Ex-situ X-ray diffraction spectra for (A)  $\text{Ag}_2\text{VO}_2\text{PO}_4$  only (B)  $\text{Ag}_2\text{VO}_2\text{PO}_4$ +PTFE and (C)  $\text{Ag}_2\text{VO}_2\text{PO}_4$ +PTFE+C at different levels of discharge with the red lines indicating the SVPO peaks and blue lines  $\text{Ag}^0$ .

| <b>Ag<sub>2</sub>VO<sub>2</sub>PO<sub>4</sub> non-discharged</b>            |                           |                           |                           |                           |                    |                    |                            |                            |                          |
|-----------------------------------------------------------------------------|---------------------------|---------------------------|---------------------------|---------------------------|--------------------|--------------------|----------------------------|----------------------------|--------------------------|
| <b>Path</b>                                                                 | <b>Ag-O path 1 (SVPO)</b> | <b>Ag-O path 2 (SVPO)</b> | <b>Ag-O path 3 (SVPO)</b> | <b>Ag-O path 4 (SVPO)</b> | <b>Ag-P (SVPO)</b> | <b>Ag-V (SVPO)</b> | <b>Ag-Ag path 1 (SVPO)</b> | <b>Ag-Ag path 2 (SVPO)</b> | <b>Ag-Ag (fcc metal)</b> |
| Near Neighbors                                                              | 5.5 ± 0.4                 | 2.8 ± 0.8                 | 2.8 ± 0.8                 | 1.4 ± 0.4                 | 1.4 ± 0.4          | 1.4 ± 0.4          | 1.4 ± 0.4                  | 1.4 ± 0.4                  | -                        |
| Interatomic Distance (Å)                                                    | 2.29 ± 0.07               | 2.61 ± 0.05               | 3.63 ± 0.01               | 3.97 ± 0.01               | 3.90 ± 0.01        | 3.92 ± 0.01        | 3.66 ± 0.05                | 3.90 ± 0.05                | -                        |
| E <sub>o</sub> (eV)                                                         | 0.3 ± 1.4                 | 0.3 ± 1.4                 | 0.3 ± 1.4                 | 0.3 ± 1.4                 | 0.3 ± 1.4          | 0.3 ± 1.4          | 0.3 ± 1.4                  | 0.3 ± 1.4                  | -                        |
| Debye Waller Factor (Å <sup>-2</sup> )                                      | 0.024 ± 0.006             | 0.024 ± 0.006             | 0.001 ± 0.006             | 0.001 ± 0.006             | 0.001 ± 0.006      | 0.001 ± 0.006      | 0.008 ± 0.007              | 0.008 ± 0.007              | -                        |
| R-factor                                                                    | 1.3                       |                           |                           |                           |                    |                    |                            |                            |                          |
| <b>Ag<sub>2</sub>VO<sub>2</sub>PO<sub>4</sub> + PTFE non-discharged</b>     |                           |                           |                           |                           |                    |                    |                            |                            |                          |
| <b>Path</b>                                                                 | <b>Ag-O path 1 (SVPO)</b> | <b>Ag-O path 2 (SVPO)</b> | <b>Ag-O path 3 (SVPO)</b> | <b>Ag-O path 4 (SVPO)</b> | <b>Ag-P (SVPO)</b> | <b>Ag-V (SVPO)</b> | <b>Ag-Ag path 1 (SVPO)</b> | <b>Ag-Ag path 2 (SVPO)</b> | <b>Ag-Ag (fcc metal)</b> |
| Near Neighbors                                                              | 5.7 ± 1.4                 | 2.8 ± 0.7                 | 2.8 ± 0.7                 | 1.4 ± 0.3                 | 1.4 ± 0.3          | 1.4 ± 0.3          | 1.4 ± 0.3                  | 1.4 ± 0.3                  | -                        |
| Interatomic Distance (Å)                                                    | 2.31 ± 0.02               | 2.63 ± 0.04               | 3.63 ± 0.03               | 3.98 ± 0.03               | 3.91 ± 0.03        | 3.92 ± 0.03        | 3.64 ± 0.05                | 3.88 ± 0.05                | -                        |
| E <sub>o</sub> (eV)                                                         | 0.2 ± 1.3                 | 0.2 ± 1.3                 | 0.2 ± 1.3                 | 0.2 ± 1.3                 | 0.2 ± 1.3          | 0.2 ± 1.3          | 0.2 ± 1.3                  | 0.2 ± 1.3                  | -                        |
| Debye Waller Factor (Å <sup>-2</sup> )                                      | 0.025 ± 0.005             | 0.25 ± 0.005              | 0.002 ± 0.005             | 0.002 ± 0.005             | 0.002 ± 0.005      | 0.002 ± 0.005      | 0.008 ± 0.006              | 0.008 ± 0.006              | -                        |
| R-factor                                                                    | 1.6                       |                           |                           |                           |                    |                    |                            |                            |                          |
| <b>Ag<sub>2</sub>VO<sub>2</sub>PO<sub>4</sub> + PTFE + C non-discharged</b> |                           |                           |                           |                           |                    |                    |                            |                            |                          |
| <b>Path</b>                                                                 | <b>Ag-O path 1 (SVPO)</b> | <b>Ag-O path 2 (SVPO)</b> | <b>Ag-O path 3 (SVPO)</b> | <b>Ag-O path 4 (SVPO)</b> | <b>Ag-P (SVPO)</b> | <b>Ag-V (SVPO)</b> | <b>Ag-Ag path 1 (SVPO)</b> | <b>Ag-Ag path 2 (SVPO)</b> | <b>Ag-Ag (fcc metal)</b> |
| Near Neighbors                                                              | 5.2 ± 1.4                 | 2.6 ± 0.7                 | 2.6 ± 0.7                 | 1.3 ± 0.4                 | 1.3 ± 0.4          | 1.3 ± 0.4          | 1.3 ± 0.4                  | 1.3 ± 0.4                  | -                        |
| Interatomic Distance (Å)                                                    | 2.31 ± 0.02               | 2.63 ± 0.05               | 3.63 ± 0.03               | 3.98 ± 0.03               | 3.91 ± 0.03        | 3.92 ± 0.03        | 3.67 ± 0.05                | 3.91 ± 0.05                | -                        |
| E <sub>o</sub> (eV)                                                         | 0.9 ± 1.5                 | 0.9 ± 1.5                 | 0.9 ± 1.5                 | 0.9 ± 1.5                 | 0.9 ± 1.5          | 0.9 ± 1.5          | 0.9 ± 1.5                  | 0.9 ± 1.5                  | -                        |
| Debye Waller Factor (Å <sup>-2</sup> )                                      | 0.023 ± 0.005             | 0.023 ± 0.005             | 0.001 ± 0.006             | 0.001 ± 0.006             | 0.001 ± 0.006      | 0.001 ± 0.006      | 0.008 ± 0.008              | 0.008 ± 0.008              | -                        |
| R-factor                                                                    | 1.7                       |                           |                           |                           |                    |                    |                            |                            |                          |

**Table S9.** EXAFS fitting results including near neighbors, interatomic distance, energy shift E<sub>o</sub>, Debye Waller factor, and R-factor for nondischarged electrodes.



| <b>Ag<sub>2</sub>VO<sub>2</sub>PO<sub>4</sub> 0.08 e</b>            |                           |                           |                           |                           |                    |                    |                            |                            |                          |
|---------------------------------------------------------------------|---------------------------|---------------------------|---------------------------|---------------------------|--------------------|--------------------|----------------------------|----------------------------|--------------------------|
| <b>Path</b>                                                         | <b>Ag-O path 1 (SVPO)</b> | <b>Ag-O path 2 (SVPO)</b> | <b>Ag-O path 3 (SVPO)</b> | <b>Ag-O path 4 (SVPO)</b> | <b>Ag-P (SVPO)</b> | <b>Ag-V (SVPO)</b> | <b>Ag-Ag path 1 (SVPO)</b> | <b>Ag-Ag path 2 (SVPO)</b> | <b>Ag-Ag (fcc metal)</b> |
| Near Neighbors                                                      | 6.1 ± 1.8                 | 3.2 ± 1.0                 | 3.2 ± 1.0                 | 1.6 ± 0.5                 | 1.6 ± 0.5          | 1.6 ± 0.5          | 1.6 ± 0.5                  | 1.6 ± 0.5                  | -                        |
| Interatomic Distance (Å)                                            | 2.31 ± 0.03               | 2.64 ± 0.05               | 3.64 ± 0.03               | 3.99 ± 0.03               | 3.92 ± 0.03        | 3.93 ± 0.03        | 3.59 ± 0.03                | 3.83 ± 0.03                | -                        |
| E <sub>o</sub> (eV)                                                 | -0.3 ± 1.6                | -0.3 ± 1.6                | -0.3 ± 1.6                | -0.3 ± 1.6                | -0.3 ± 1.6         | -0.3 ± 1.6         | -0.3 ± 1.6                 | -0.3 ± 1.6                 | -                        |
| Debye Waller Factor (Å <sup>-2</sup> )                              | 0.027 ± 0.006             | 0.027 ± 0.006             | 0.010 ± 0.005             | 0.010 ± 0.005             | 0.010 ± 0.005      | 0.010 ± 0.005      | 0.010 ± 0.005              | 0.010 ± 0.005              | -                        |
| R-factor                                                            | 1.8                       |                           |                           |                           |                    |                    |                            |                            |                          |
| <b>Ag<sub>2</sub>VO<sub>2</sub>PO<sub>4</sub> + PTFE 0.08 e</b>     |                           |                           |                           |                           |                    |                    |                            |                            |                          |
| <b>Path</b>                                                         | <b>Ag-O path 1 (SVPO)</b> | <b>Ag-O path 2 (SVPO)</b> | <b>Ag-O path 3 (SVPO)</b> | <b>Ag-O path 4 (SVPO)</b> | <b>Ag-P (SVPO)</b> | <b>Ag-V (SVPO)</b> | <b>Ag-Ag path 1 (SVPO)</b> | <b>Ag-Ag path 2 (SVPO)</b> | <b>Ag-Ag (fcc metal)</b> |
| Near Neighbors                                                      | 5.4 ± 1.4                 | 2.8 ± 0.7                 | 2.8 ± 0.7                 | 1.4 ± 0.3                 | 1.4 ± 0.3          | 1.4 ± 0.3          | 1.4 ± 0.3                  | 1.4 ± 0.3                  | -                        |
| Interatomic Distance (Å)                                            | 2.29 ± 0.02               | 2.62 ± 0.05               | 3.63 ± 0.03               | 3.97 ± 0.03               | 3.91 ± 0.03        | 3.92 ± 0.03        | 3.57 ± 0.03                | 3.81 ± 0.03                | -                        |
| E <sub>o</sub> (eV)                                                 | -0.1 ± 1.5                | -0.1 ± 1.5                | -0.1 ± 1.5                | -0.1 ± 1.5                | -0.1 ± 1.5         | -0.1 ± 1.5         | -0.1 ± 1.5                 | -0.1 ± 1.5                 | -                        |
| Debye Waller Factor (Å <sup>-2</sup> )                              | 0.026 ± 0.005             | 0.026 ± 0.005             | 0.007 ± 0.006             | 0.007 ± 0.006             | 0.007 ± 0.006      | 0.007 ± 0.006      | 0.014 ± 0.010              | 0.014 ± 0.010              | -                        |
| R-factor                                                            | 1.7                       |                           |                           |                           |                    |                    |                            |                            |                          |
| <b>Ag<sub>2</sub>VO<sub>2</sub>PO<sub>4</sub> + PTFE + C 0.08 e</b> |                           |                           |                           |                           |                    |                    |                            |                            |                          |
| <b>Path</b>                                                         | <b>Ag-O path 1 (SVPO)</b> | <b>Ag-O path 2 (SVPO)</b> | <b>Ag-O path 3 (SVPO)</b> | <b>Ag-O path 4 (SVPO)</b> | <b>Ag-P (SVPO)</b> | <b>Ag-V (SVPO)</b> | <b>Ag-Ag path 1 (SVPO)</b> | <b>Ag-Ag path 2 (SVPO)</b> | <b>Ag-Ag (fcc metal)</b> |
| Near Neighbors                                                      | 5.6 ± 1.3                 | 2.8 ± 0.6                 | 2.8 ± 0.6                 | 1.4 ± 0.3                 | 1.4 ± 0.3          | 1.4 ± 0.3          | 1.4 ± 0.3                  | 1.4 ± 0.3                  | 0.5 ± 0.2                |
| Interatomic Distance (Å)                                            | 2.31 ± 0.02               | 2.64 ± 0.05               | 3.64 ± 0.03               | 3.99 ± 0.03               | 3.93 ± 0.03        | 3.94 ± 0.03        | 3.59 ± 0.03                | 3.83 ± 0.03                | 2.87 ± 0.03              |
| E <sub>o</sub> (eV)                                                 | 0.1 ± 1.3                 | 0.1 ± 1.3                 | 0.1 ± 1.3                 | 0.1 ± 1.3                 | 0.1 ± 1.3          | 0.1 ± 1.3          | 0.1 ± 1.3                  | 0.1 ± 1.3                  | 0.1 ± 1.3                |
| Debye Waller Factor (Å <sup>-2</sup> )                              | 0.027 ± 0.004             | 0.001 ± 0.003             | 0.001 ± 0.003             | 0.001 ± 0.003             | 0.001 ± 0.003      | 0.001 ± 0.003      | 0.001 ± 0.003              | 0.001 ± 0.003              | 0.001 ± 0.003            |
| R-factor                                                            | 1.4                       |                           |                           |                           |                    |                    |                            |                            |                          |

**Table S10.** EXAFS fitting results including number of near neighbors, interatomic distance, energy shift E<sub>o</sub>, Debye Waller factor, and R-factor for electrodes discharged to 0.08 electron equivalents.

| <b>Ag<sub>2</sub>VO<sub>2</sub>PO<sub>4</sub> 0.2 e</b>            |                           |                           |                           |                           |                    |                    |                            |                            |                          |
|--------------------------------------------------------------------|---------------------------|---------------------------|---------------------------|---------------------------|--------------------|--------------------|----------------------------|----------------------------|--------------------------|
| <b>Path</b>                                                        | <b>Ag-O path 1 (SVPO)</b> | <b>Ag-O path 2 (SVPO)</b> | <b>Ag-O path 3 (SVPO)</b> | <b>Ag-O path 4 (SVPO)</b> | <b>Ag-P (SVPO)</b> | <b>Ag-V (SVPO)</b> | <b>Ag-Ag path 1 (SVPO)</b> | <b>Ag-Ag path 2 (SVPO)</b> | <b>Ag-Ag (fcc metal)</b> |
| Near Neighbors                                                     | 5.8 ± 1.4                 | 2.8 ± 0.7                 | 2.8 ± 0.7                 | 1.4 ± 0.4                 | 1.4 ± 0.4          | 1.4 ± 0.4          | 1.4 ± 0.4                  | 1.4 ± 0.4                  | 0.5 ± 0.3                |
| Interatomic Distance (Å)                                           | 2.31 ± 0.02               | 2.64 ± 0.05               | 3.65 ± 0.03               | 3.99 ± 0.03               | 3.93 ± 0.03        | 3.94 ± 0.03        | 3.6 ± 0.03                 | 3.84 ± 0.03                | 2.87 ± 0.03              |
| E <sub>o</sub> (eV)                                                | 0.1 ± 1.4                 | 0.1 ± 1.4                 | 0.1 ± 1.4                 | 0.1 ± 1.4                 | 0.1 ± 1.4          | 0.1 ± 1.4          | 0.1 ± 1.4                  | 0.1 ± 1.4                  | 0.1 ± 1.4                |
| Debye Waller Factor (Å <sup>-2</sup> )                             | 0.028 ± 0.005             | 0.028 ± 0.005             | 0.010 ± 0.004             | 0.010 ± 0.004             | 0.010 ± 0.004      | 0.010 ± 0.004      | 0.010 ± 0.004              | 0.010 ± 0.004              | 0.010 ± 0.004            |
| R-factor                                                           | 1.6                       |                           |                           |                           |                    |                    |                            |                            |                          |
| <b>Ag<sub>2</sub>VO<sub>2</sub>PO<sub>4</sub> + PTFE 0.2 e</b>     |                           |                           |                           |                           |                    |                    |                            |                            |                          |
| <b>Path</b>                                                        | <b>Ag-O path 1 (SVPO)</b> | <b>Ag-O path 2 (SVPO)</b> | <b>Ag-O path 3 (SVPO)</b> | <b>Ag-O path 4 (SVPO)</b> | <b>Ag-P (SVPO)</b> | <b>Ag-V (SVPO)</b> | <b>Ag-Ag path 1 (SVPO)</b> | <b>Ag-Ag path 2 (SVPO)</b> | <b>Ag-Ag (fcc metal)</b> |
| Near Neighbors                                                     | 5.5 ± 1.1                 | 2.8 ± 0.5                 | 2.8 ± 0.5                 | 1.4 ± 0.3                 | 1.4 ± 0.3          | 1.4 ± 0.3          | 1.4 ± 0.3                  | 1.4 ± 0.3                  | 0.5 ± 0.3                |
| Interatomic Distance (Å)                                           | 2.31 ± 0.02               | 2.64 ± 0.05               | 3.63 ± 0.03               | 3.97 ± 0.03               | 3.91 ± 0.03        | 3.92 ± 0.03        | 3.58 ± 0.03                | 3.82 ± 0.03                | 2.85 ± 0.03              |
| E <sub>o</sub> (eV)                                                | -0.2 ± 1.0                | -0.2 ± 1.0                | -0.2 ± 1.0                | -0.2 ± 1.0                | -0.2 ± 1.0         | -0.2 ± 1.0         | -0.2 ± 1.0                 | -0.2 ± 1.0                 | -0.2 ± 1.0               |
| Debye Waller Factor (Å <sup>-2</sup> )                             | 0.026 ± 0.004             | 0.026 ± 0.004             | 0.009 ± 0.004             | 0.009 ± 0.004             | 0.009 ± 0.004      | 0.009 ± 0.004      | 0.009 ± 0.004              | 0.009 ± 0.004              | 0.009 ± 0.004            |
| R-factor                                                           | 1.3                       |                           |                           |                           |                    |                    |                            |                            |                          |
| <b>Ag<sub>2</sub>VO<sub>2</sub>PO<sub>4</sub> + PTFE + C 0.2 e</b> |                           |                           |                           |                           |                    |                    |                            |                            |                          |
| <b>Path</b>                                                        | <b>Ag-O path 1 (SVPO)</b> | <b>Ag-O path 2 (SVPO)</b> | <b>Ag-O path 3 (SVPO)</b> | <b>Ag-O path 4 (SVPO)</b> | <b>Ag-P (SVPO)</b> | <b>Ag-V (SVPO)</b> | <b>Ag-Ag path 1 (SVPO)</b> | <b>Ag-Ag path 2 (SVPO)</b> | <b>Ag-Ag (fcc metal)</b> |
| Near Neighbors                                                     | 5.5 ± 1.3                 | 2.8 ± 0.6                 | 2.8 ± 0.6                 | 1.4 ± 0.3                 | 1.4 ± 0.3          | 1.4 ± 0.3          | 1.4 ± 0.3                  | 1.4 ± 0.3                  | 0.9 ± 0.3                |
| Interatomic Distance (Å)                                           | 2.32 ± 0.02               | 2.65 ± 0.02               | 3.66 ± 0.03               | 4.00 ± 0.03               | 3.94 ± 0.03        | 3.95 ± 0.03        | 3.61 ± 0.03                | 3.85 ± 0.03                | 2.88 ± 0.02              |
| E <sub>o</sub> (eV)                                                | 0.3 ± 1.2                 | 0.3 ± 1.2                 | 0.3 ± 1.2                 | 0.3 ± 1.2                 | 0.3 ± 1.2          | 0.3 ± 1.2          | 0.3 ± 1.2                  | 0.3 ± 1.2                  | 0.3 ± 1.2                |
| Debye Waller Factor (Å <sup>-2</sup> )                             | 0.027 ± 0.005             | 0.008 ± 0.008             | 0.008 ± 0.008             | 0.008 ± 0.008             | 0.008 ± 0.008      | 0.008 ± 0.008      | 0.008 ± 0.008              | 0.008 ± 0.008              | 0.008 ± 0.008            |
| R-factor                                                           | 1.6                       |                           |                           |                           |                    |                    |                            |                            |                          |

**Table S11.** EXAFS fitting results including number of near neighbors, interatomic distance, energy shift E<sub>o</sub>, Debye Waller factor, and R-factor for electrodes discharged to 0.2 electron equivalents.

| <b>Ag<sub>2</sub>VO<sub>2</sub>PO<sub>4</sub> 0.5 e</b>            |                           |                           |                           |                           |                    |                    |                            |                            |                          |
|--------------------------------------------------------------------|---------------------------|---------------------------|---------------------------|---------------------------|--------------------|--------------------|----------------------------|----------------------------|--------------------------|
| <b>Path</b>                                                        | <b>Ag-O path 1 (SVPO)</b> | <b>Ag-O path 2 (SVPO)</b> | <b>Ag-O path 3 (SVPO)</b> | <b>Ag-O path 4 (SVPO)</b> | <b>Ag-P (SVPO)</b> | <b>Ag-V (SVPO)</b> | <b>Ag-Ag path 1 (SVPO)</b> | <b>Ag-Ag path 2 (SVPO)</b> | <b>Ag-Ag (fcc metal)</b> |
| Near Neighbors                                                     | 5.0 ± 1.4                 | 2.6 ± 0.7                 | 2.6 ± 0.7                 | 1.3 ± 0.4                 | 1.3 ± 0.4          | 1.3 ± 0.4          | 1.3 ± 0.4                  | 1.3 ± 0.4                  | 2.1 ± 0.5                |
| Interatomic Distance (Å)                                           | 2.33 ± 0.03               | 2.66 ± 0.04               | 3.64 ± 0.04               | 3.99 ± 0.04               | 3.93 ± 0.04        | 3.94 ± 0.04        | 3.59 ± 0.04                | 3.83 ± 0.04                | 2.87 ± 0.01              |
| E <sub>o</sub> (eV)                                                | 0.5 ± 1.2                 | 0.5 ± 1.2                 | 0.5 ± 1.2                 | 0.5 ± 1.2                 | 0.5 ± 1.2          | 0.5 ± 1.2          | 0.5 ± 1.2                  | 0.5 ± 1.2                  | 0.5 ± 1.2                |
| Debye Waller Factor (Å <sup>-2</sup> )                             | 0.028 ± 0.006             | 0.011 ± 0.003             | 0.011 ± 0.003             | 0.011 ± 0.003             | 0.011 ± 0.003      | 0.011 ± 0.003      | 0.011 ± 0.003              | 0.011 ± 0.003              | 0.011 ± 0.003            |
| R-factor                                                           | 1.6                       |                           |                           |                           |                    |                    |                            |                            |                          |
| <b>Ag<sub>2</sub>VO<sub>2</sub>PO<sub>4</sub> + PTFE 0.5 e</b>     |                           |                           |                           |                           |                    |                    |                            |                            |                          |
| <b>Path</b>                                                        | <b>Ag-O path 1 (SVPO)</b> | <b>Ag-O path 2 (SVPO)</b> | <b>Ag-O path 3 (SVPO)</b> | <b>Ag-O path 4 (SVPO)</b> | <b>Ag-P (SVPO)</b> | <b>Ag-V (SVPO)</b> | <b>Ag-Ag path 1 (SVPO)</b> | <b>Ag-Ag path 2 (SVPO)</b> | <b>Ag-Ag (fcc metal)</b> |
| Near Neighbors                                                     | 5.1 ± 1.4                 | 2.6 ± 0.7                 | 2.6 ± 0.7                 | 1.3 ± 0.4                 | 1.3 ± 0.4          | 1.3 ± 0.4          | 1.3 ± 0.4                  | 1.3 ± 0.4                  | 1.7 ± 0.5                |
| Interatomic Distance (Å)                                           | 2.32 ± 0.03               | 2.66 ± 0.04               | 3.64 ± 0.04               | 3.98 ± 0.04               | 3.92 ± 0.04        | 3.93 ± 0.04        | 3.58 ± 0.04                | 3.82 ± 0.04                | 2.87 ± 0.01              |
| E <sub>o</sub> (eV)                                                | 0.4 ± 1.4                 | 0.4 ± 1.4                 | 0.4 ± 1.4                 | 0.4 ± 1.4                 | 0.4 ± 1.4          | 0.4 ± 1.4          | 0.4 ± 1.4                  | 0.4 ± 1.4                  | 0.4 ± 1.4                |
| Debye Waller Factor (Å <sup>-2</sup> )                             | 0.028 ± 0.006             | 0.028 ± 0.006             | 0.010 ± 0.003             | 0.010 ± 0.003             | 0.010 ± 0.003      | 0.010 ± 0.003      | 0.010 ± 0.003              | 0.010 ± 0.003              | 0.010 ± 0.003            |
| R-factor                                                           | 2.0                       |                           |                           |                           |                    |                    |                            |                            |                          |
| <b>Ag<sub>2</sub>VO<sub>2</sub>PO<sub>4</sub> + PTFE + C 0.5 e</b> |                           |                           |                           |                           |                    |                    |                            |                            |                          |
| <b>Path</b>                                                        | <b>Ag-O path 1 (SVPO)</b> | <b>Ag-O path 2 (SVPO)</b> | <b>Ag-O path 3 (SVPO)</b> | <b>Ag-O path 4 (SVPO)</b> | <b>Ag-P (SVPO)</b> | <b>Ag-V (SVPO)</b> | <b>Ag-Ag path 1 (SVPO)</b> | <b>Ag-Ag path 2 (SVPO)</b> | <b>Ag-Ag (fcc metal)</b> |
| Near Neighbors                                                     | 4.4 ± 1.5                 | 1.2 ± 0.8                 | 1.2 ± 0.8                 | 1.1 ± 0.4                 | 1.1 ± 0.4          | 1.1 ± 0.4          | 1.1 ± 0.4                  | 1.1 ± 0.4                  | 2.4 ± 0.5                |
| Interatomic Distance (Å)                                           | 2.32 ± 0.04               | 2.62 ± 0.09               | 3.62 ± 0.05               | 3.97 ± 0.05               | 3.90 ± 0.05        | 3.92 ± 0.05        | 3.58 ± 0.05                | 3.81 ± 0.05                | 2.85 ± 0.01              |
| E <sub>o</sub> (eV)                                                | -0.7 ± 1.3                | -0.7 ± 1.3                | -0.7 ± 1.3                | -0.7 ± 1.3                | -0.7 ± 1.3         | -0.7 ± 1.3         | -0.7 ± 1.3                 | -0.7 ± 1.3                 | -0.7 ± 1.3               |
| Debye Waller Factor (Å <sup>-2</sup> )                             | 0.025 ± 0.007             | 0.025 ± 0.007             | 0.012 ± 0.003             | 0.012 ± 0.003             | 0.012 ± 0.003      | 0.012 ± 0.003      | 0.012 ± 0.003              | 0.012 ± 0.003              | 0.012 ± 0.003            |
| R-factor                                                           | 2.6                       |                           |                           |                           |                    |                    |                            |                            |                          |

**Table S12.** EXAFS fitting results including number of near neighbors, interatomic distance, energy shift E<sub>o</sub>, Debye Waller factor, and R-factor for electrodes discharged to 0.5 electron equivalents.

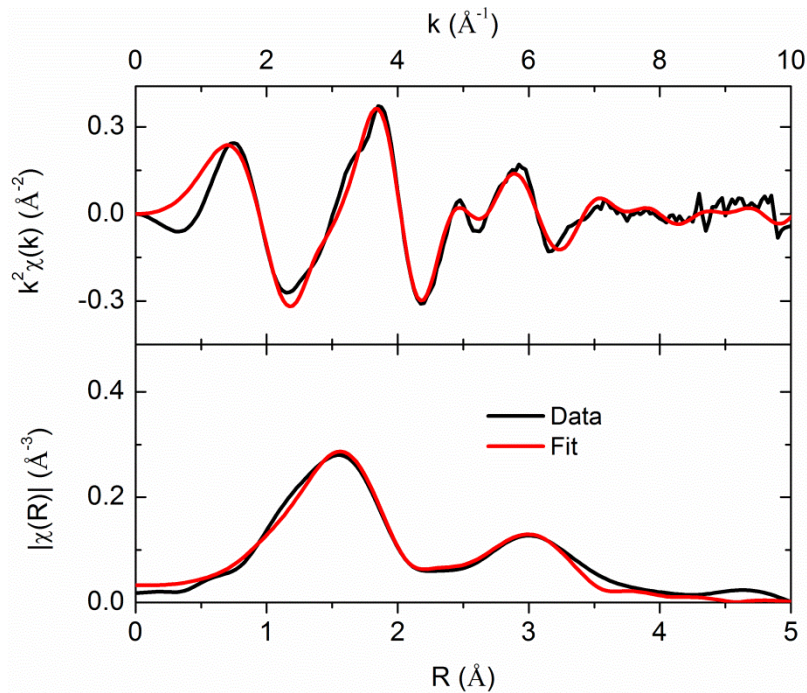

**Figure S13:** EXAFS fit of the undischarged state for the  $\text{Ag}_2\text{VO}_2\text{PO}_4$  electrode in  $|\chi(R)|$  and  $k^2\chi(k)$ .

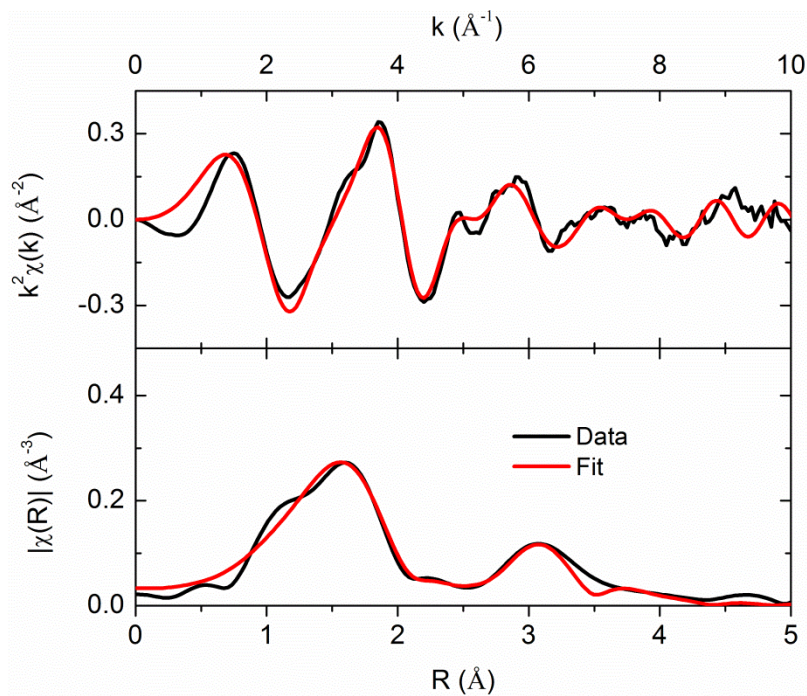

**Figure S14:** EXAFS fit of the  $\text{Ag}_2\text{VO}_2\text{PO}_4$  electrode discharged to 0.08 electron equivalents in  $|\chi(R)|$  and  $k^2\chi(k)$ .

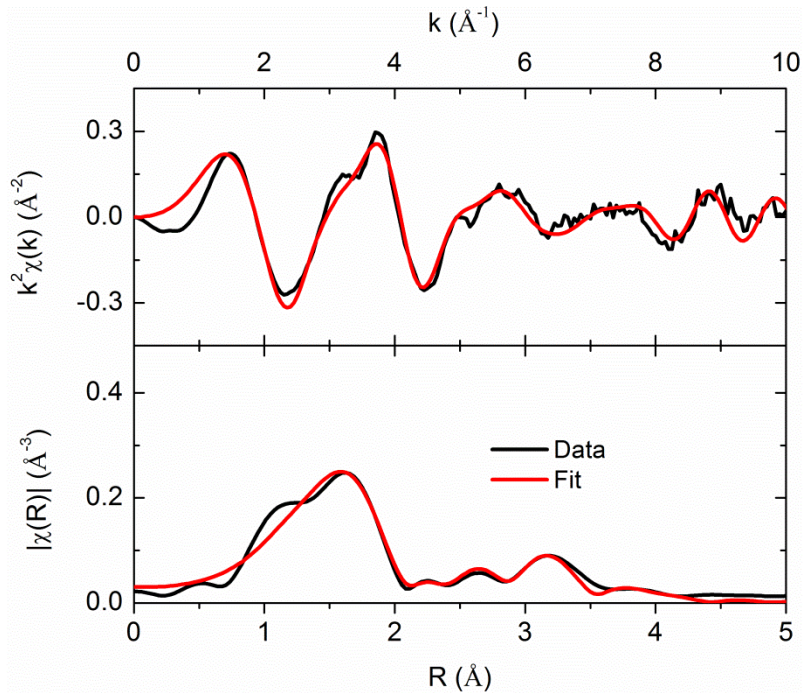

**Figure S15:** EXAFS fit of the  $\text{Ag}_2\text{VO}_2\text{PO}_4$  electrode discharged to 0.2 electron equivalents in  $|\chi(R)|$  and  $k^2\chi(k)$ .

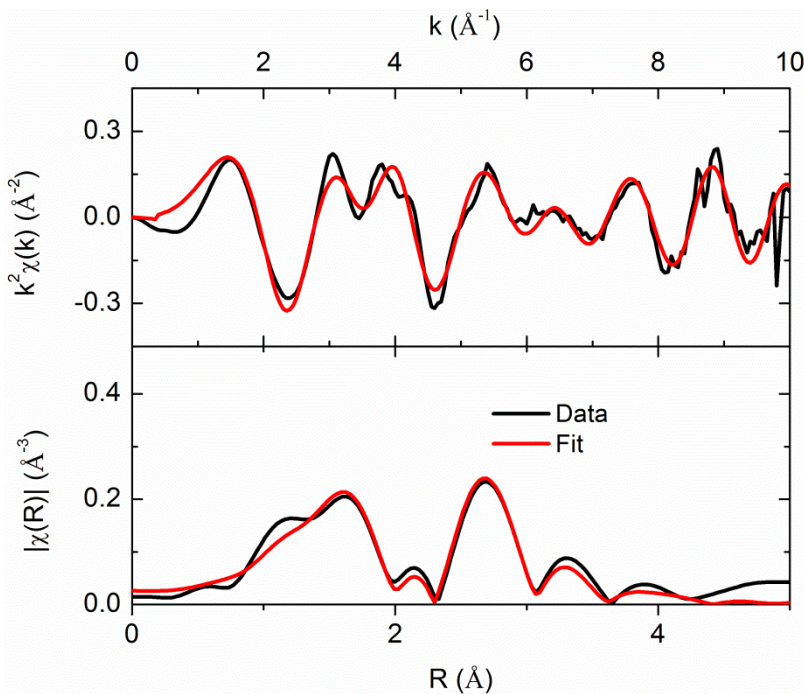

**Figure S16:** EXAFS fit of the  $\text{Ag}_2\text{VO}_2\text{PO}_4$  electrode discharged to 0.2 electron equivalents in  $|\chi(R)|$  and  $k^2\chi(k)$ .

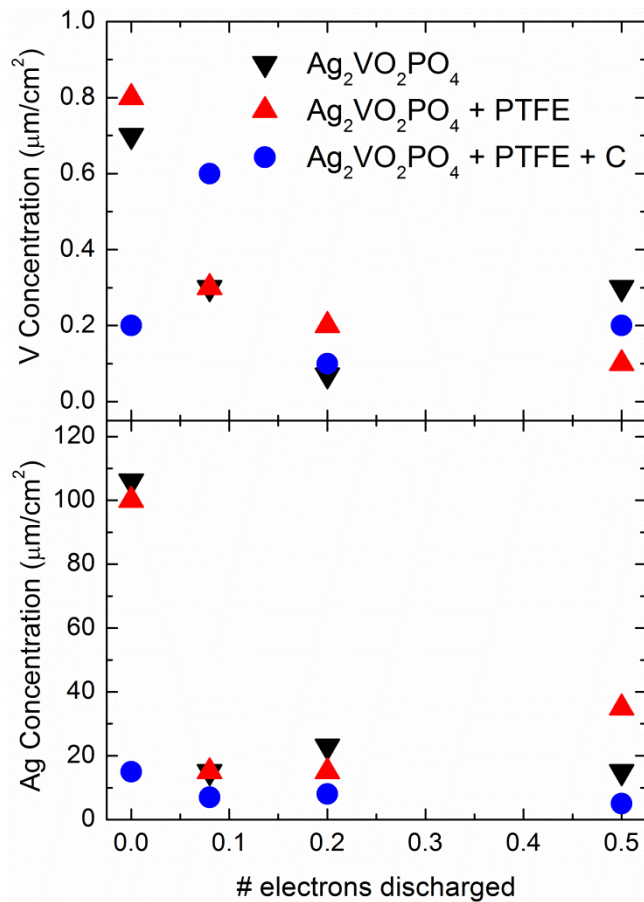

**Figure S17.** Quantitative analysis of lithium anodes recovered from  $\text{Li}/\text{Ag}_2\text{VO}_2\text{PO}_4$ .
